# Supplementary material for: The developmental dynamics of the Populus stem transcriptome
Source: PubMed Central journal article supplement (PMC6330540; doi:10.1111/pbi.12958), 2018-06-25
Supplement: PBI-17-206-s001.pdf [file PBI-17-206-s001.pdf]

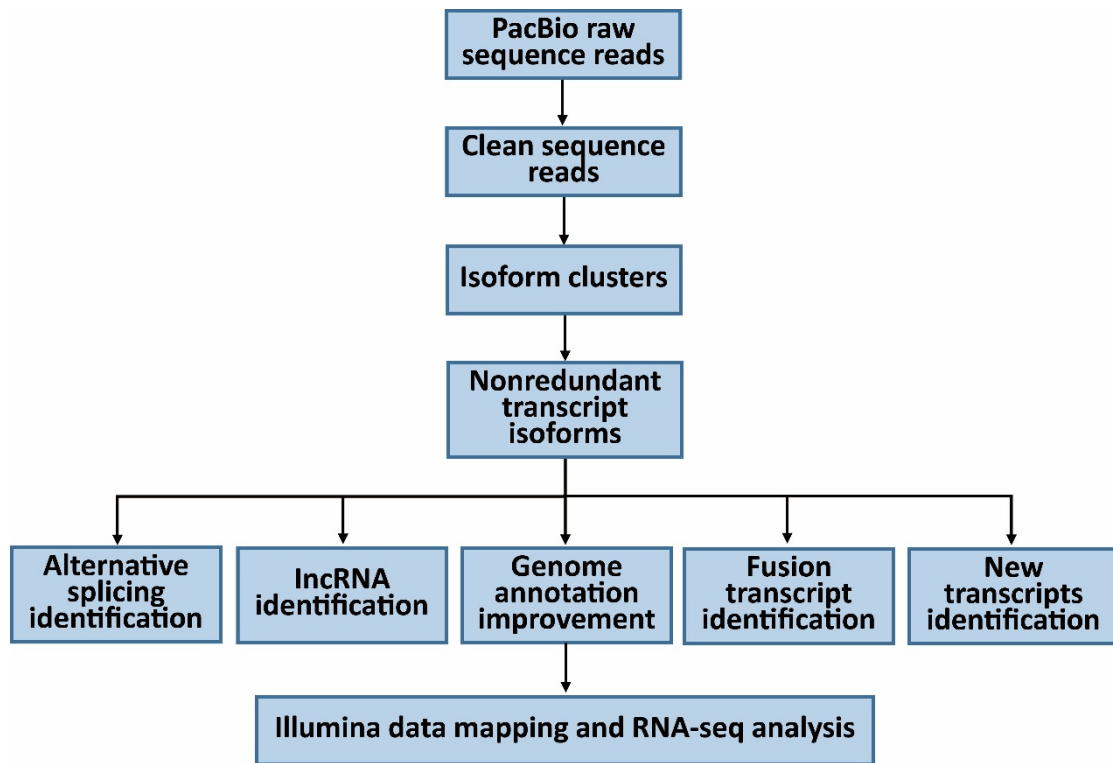

**Figure S1** Schematic of the computational and bioinformatics pipeline for joint analysis of PacBio Iso-Seq and RNA-seq reads.

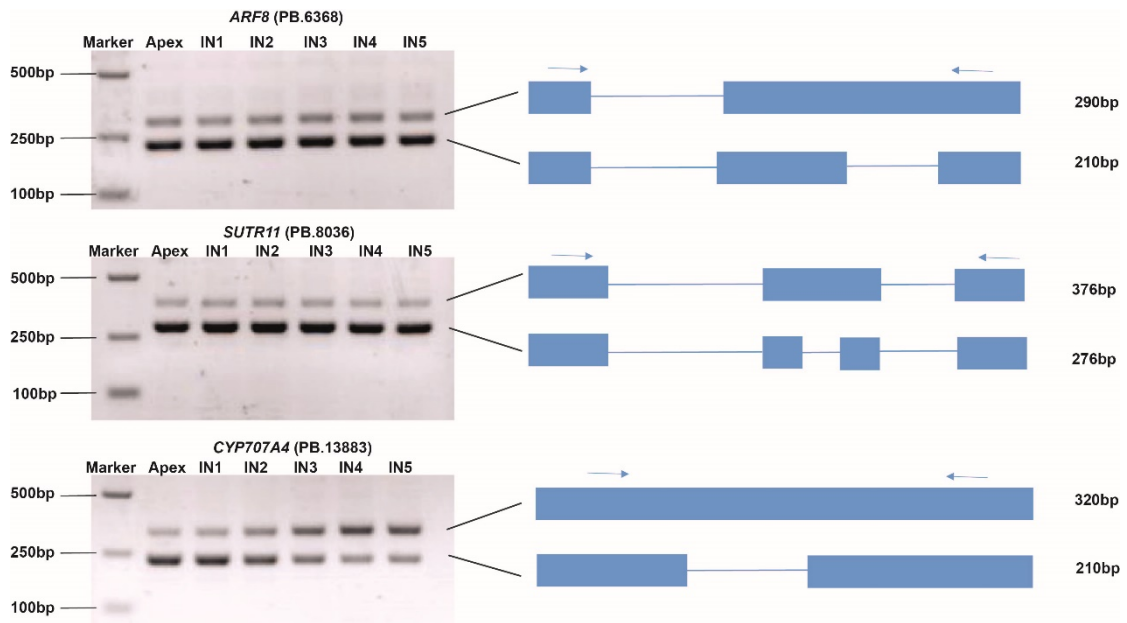

**Figure S2** RT-PCR verification of alternative splicing events for three genes.

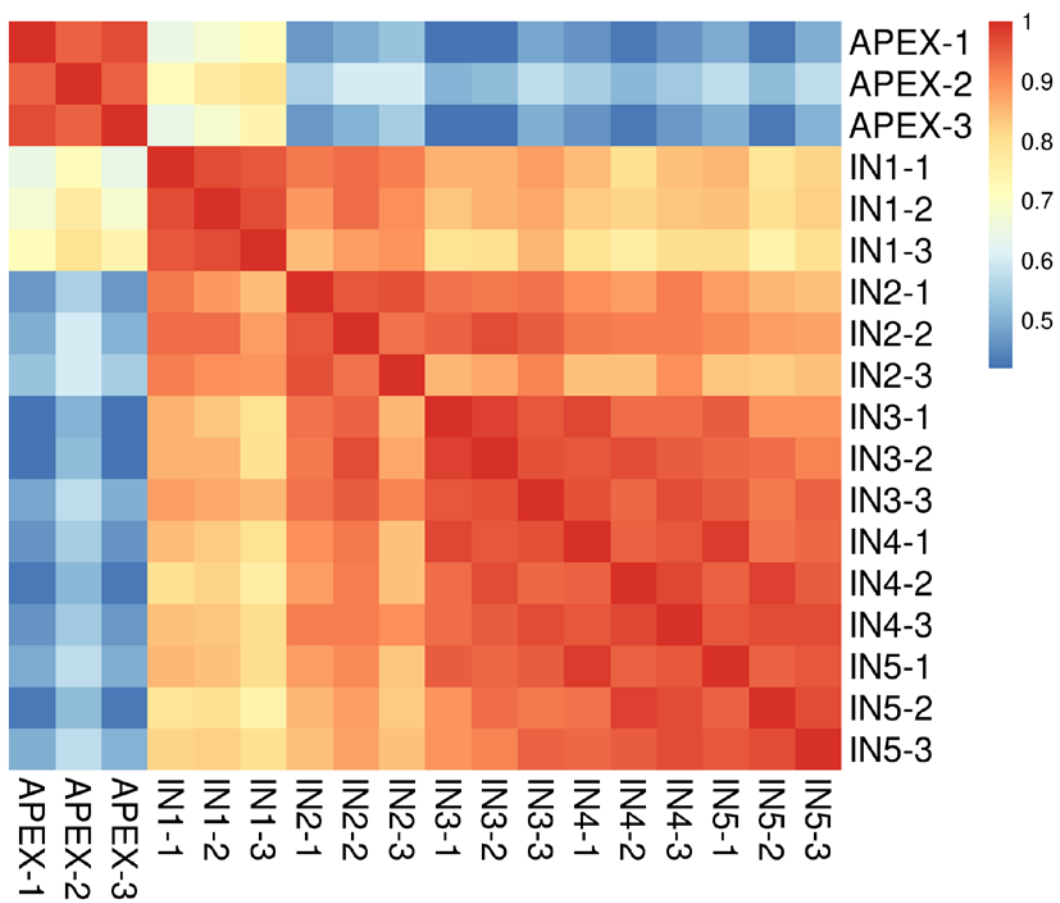

**Figure S3** Analysis of expression correlation between samples.

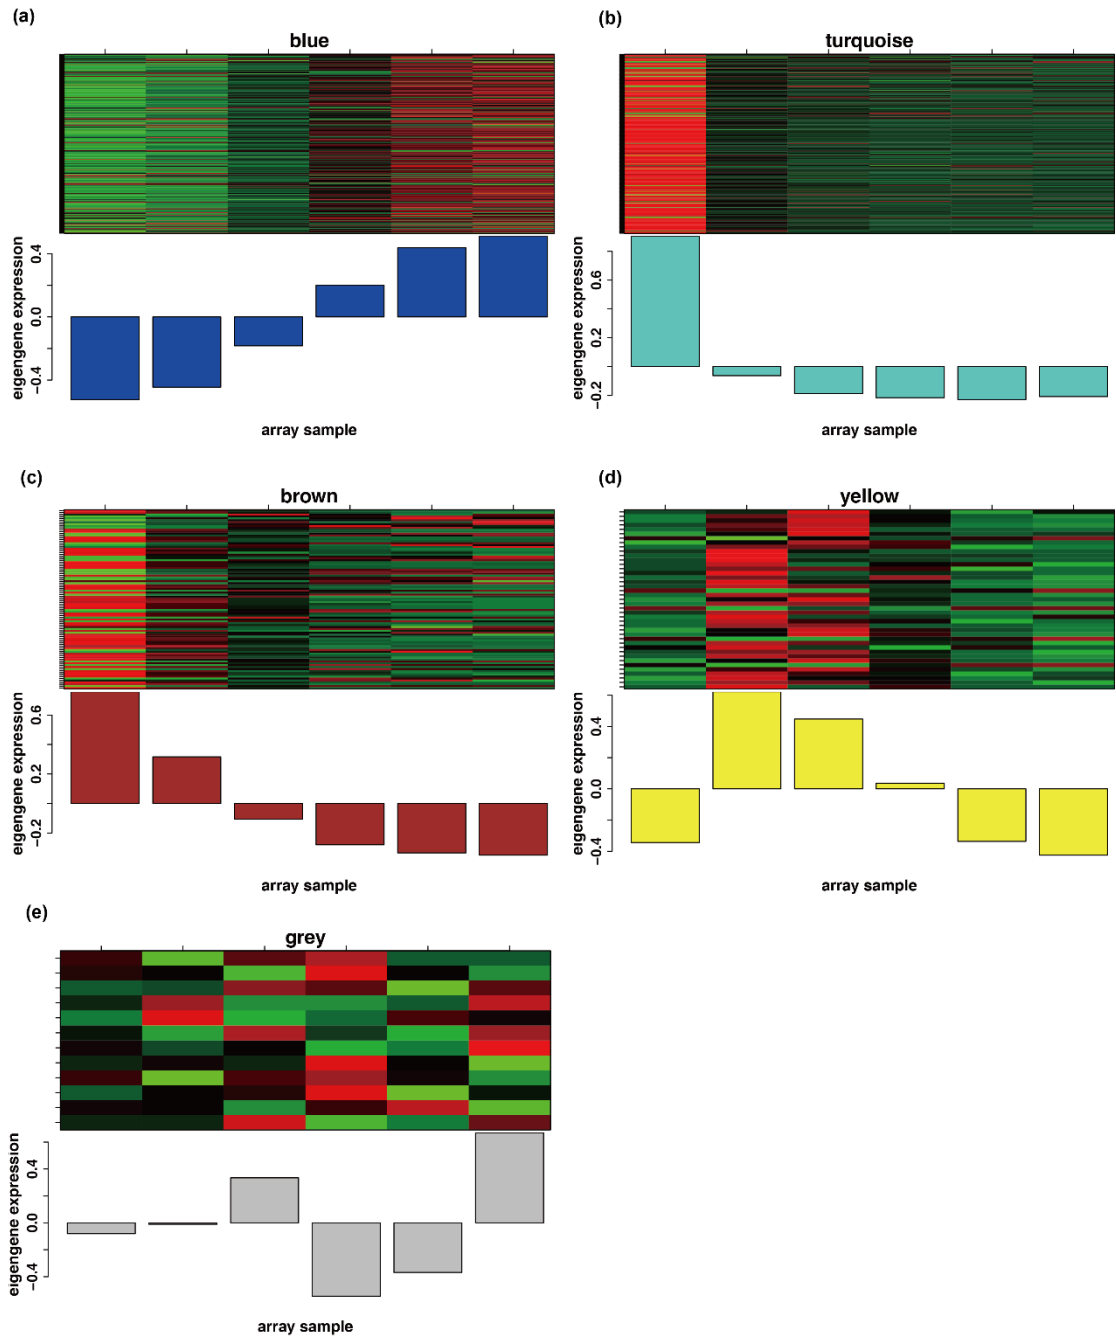

**Figure S4** Heatmaps of different transcription factor WGCNA modules.

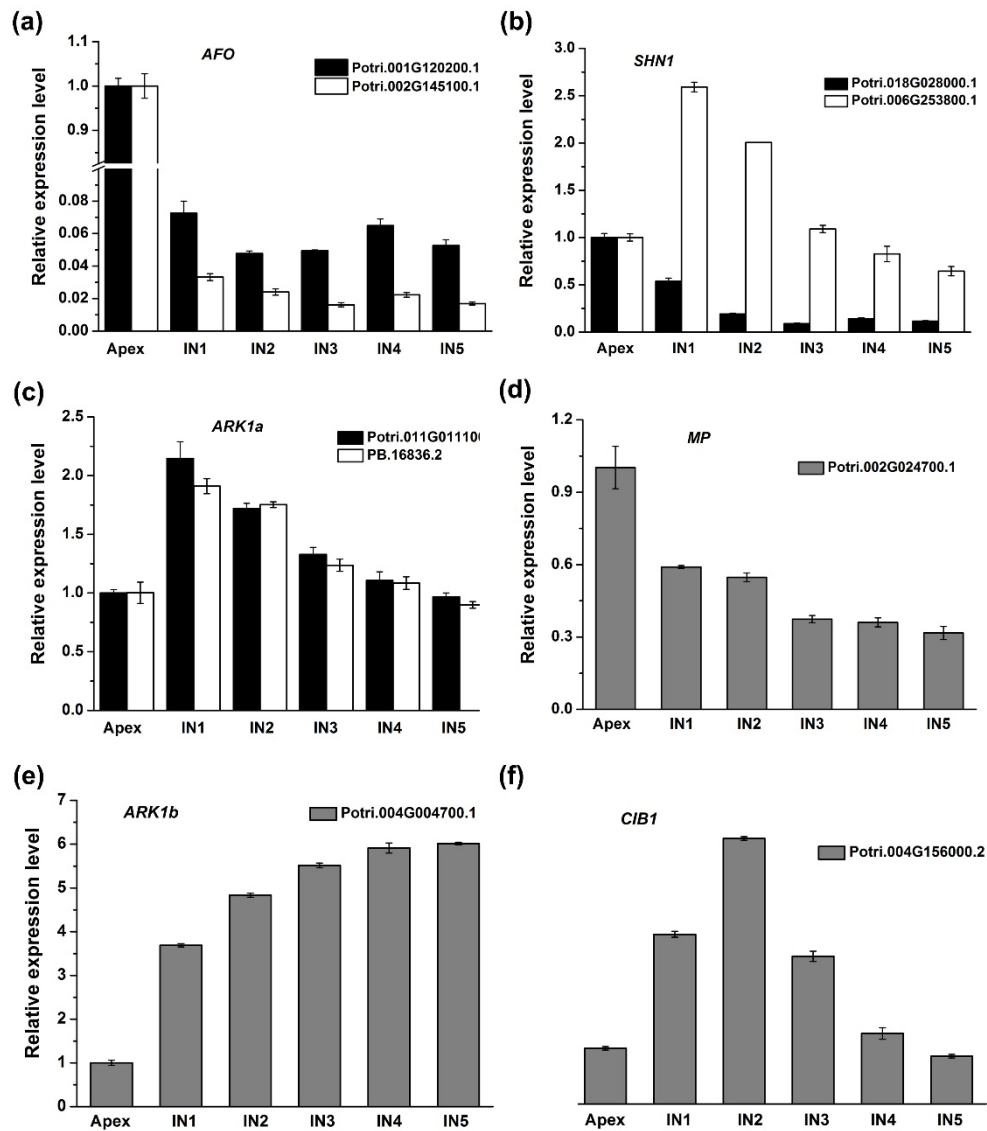

**Figure S5** Expression verification of isoforms in different sections of the Populus stem.

- (a) Expression of two major transcripts encoding AFO in different stem.
- (b) Expression of two major transcripts encoding SHN1 in different stem.
- (c) Expression of two major transcripts encoding ARK1a in different stem.
- (d) Expression of major transcripts encoding MP in different stem.
- (e) Expression of major transcripts encoding ARK1b in different stem.
- (f) Expression of major transcripts encoding AFO in different stem.

**Table S1** Sequences of primers used for alternative splicing and gene expression validation.

| Gene name | Primer     | Sequence (5' -3')         |
|-----------|------------|---------------------------|
| AFO       | 1202. 1L   | TTCACTTCGGTCTCATGCCC      |
|           | 1202. 1R   | CGTAGCAGCTCCACTTCTTAG     |
| AFO       | 1451. 1L   | TACCCACTGGTCAGACAATCC     |
|           | 1451. 1R   | CAAAGCTGCTCGGAGGAAGA      |
| MP        | 247. 1L    | AAGTTGGAGTGCAGGCTAATAG    |
|           | 247. 1R    | TGTGGTGGTGGTCTTGTAGC      |
| SHN1      | 2538. 1L   | GACACCGGACCTTCTCGAC       |
|           | 2538. 1R   | GATTGGCAACTGTTTATCTGTG    |
| SHN1      | 280. 1L    | TGAGATTGAGCCGAAAATG       |
|           | 280. 1R    | TGTCTAAACCCATAAGAAATAG    |
| ARK1a     | 16836. 2L  | ATTGATAACCGTGCCCCATC      |
|           | 16836. 2R  | TGAACGATCAAATCGAGGAA      |
| ARK1a     | 111. 1L    | ATGCTGTTCTCAAGTGTGTT      |
|           | 111. 1R    | TGGCTCCAAAACAGGCTTAA      |
| ARK1b     | 47. 1L     | ACTGTGAGGGAGGGAGGGAG      |
|           | 47. 1R     | AGAAACCAAGCAGGAAAACG      |
| Tublin    | TUBLIN-L   | CTTGATCGAGTGAGGAAGTTGGCTG |
|           | TUBLIN-R   | ACGACTGCCGTTGAAACCTGAGGAG |
| ARF8      | PB. 6368L  | CATTACAGCCTTTGACACCG      |
|           | PB. 6368R  | TGGAGATCCCTGGCGATAAG      |
| SUTR11    | PB. 8036L  | AGGTTCCCTGGTGTGTTTATT     |
|           | PB. 8036R  | TCAGAGGCGTGGAGCTTATC      |
| CYP707A4  | PB. 13883L | AATGGGCTGGCCTTTTGTAG      |
|           | PB. 13883R | GCTGAAGGGCCAATCATCTT      |
